# Supplementary material
Source: HighWire-hosted journal article supplement (http://www.qdcxjkg.com/highwire/filestream/130086/field_highwire_adjunct_files/0/online_data.pdf)

# **Physical activity and exercise capacity in patients with moderate COPD exacerbations**

**Ayedh D Alahmari<sup>1</sup>, Beverly S Kowlessar<sup>2</sup>, Anant RC Patel<sup>1</sup>, Alex J Mackay<sup>1</sup>, James P Allinson<sup>2</sup>, Jadwiga A Wedzicha<sup>2</sup>, Gavin C Donaldson<sup>2</sup>**

**Online Data Supplement**

Figure S1 (protocol 1)

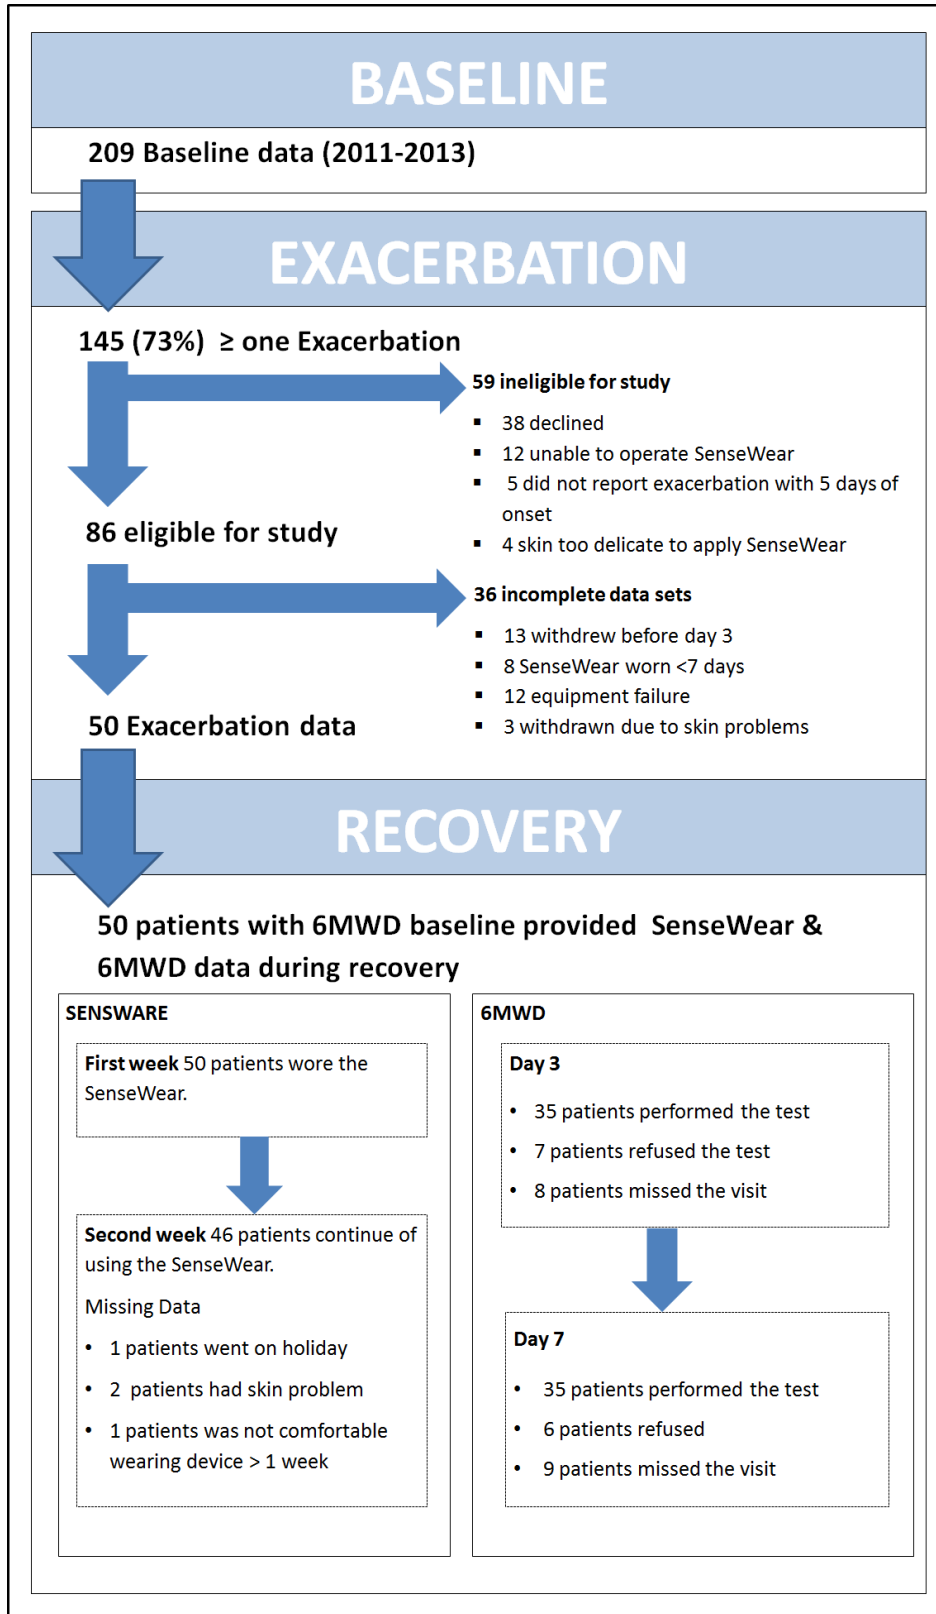

Figure S2 (protocol 2)

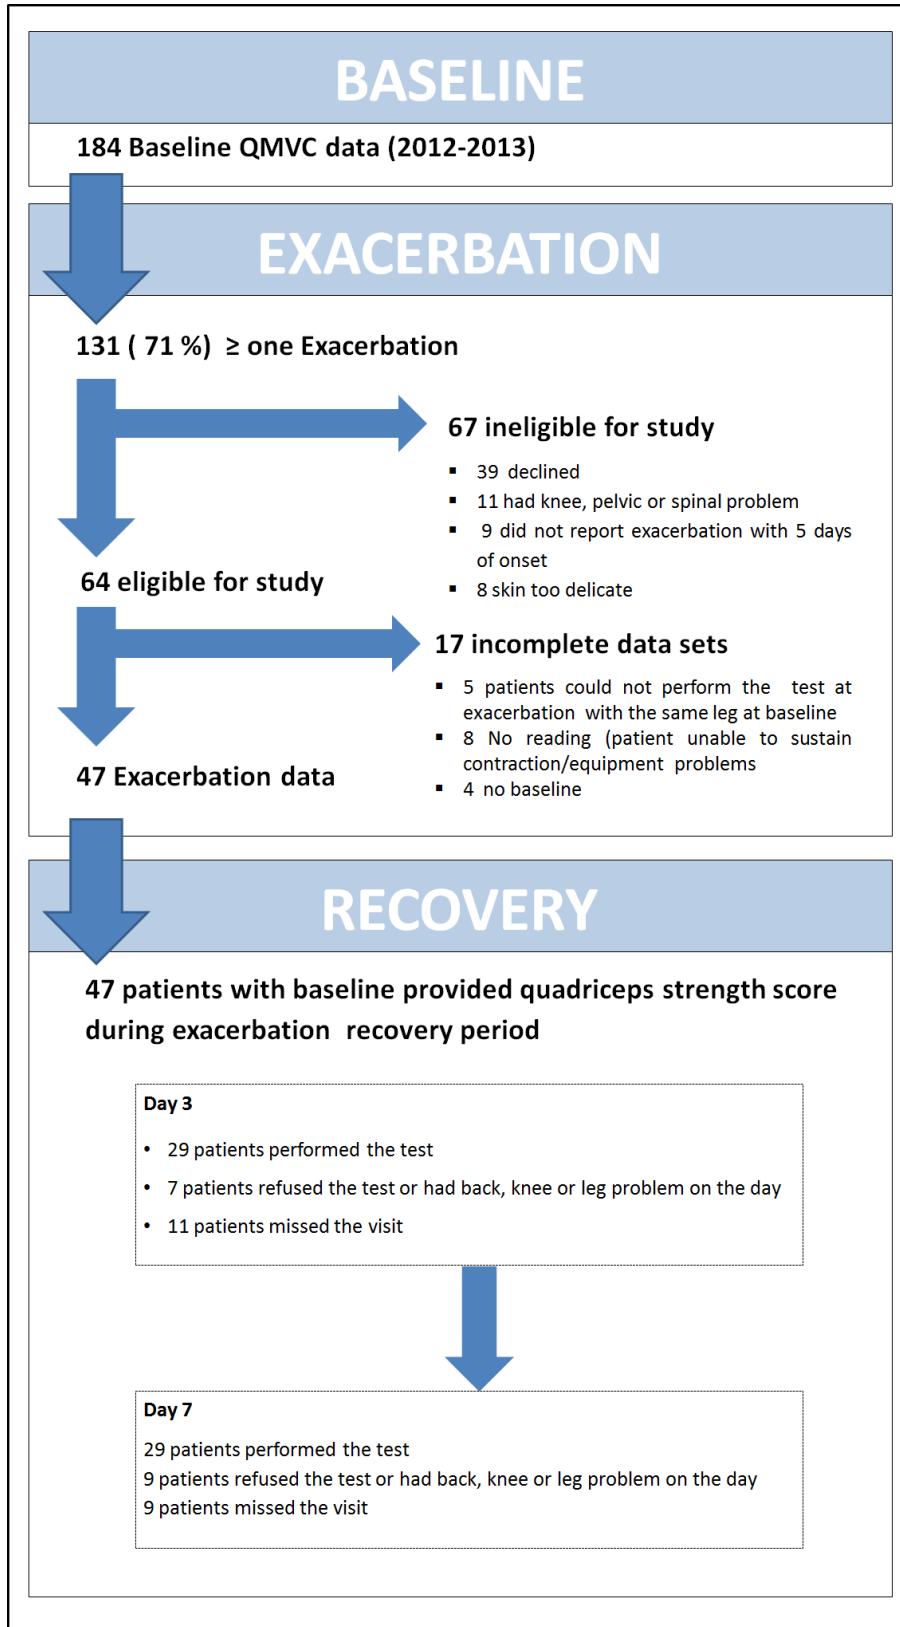

Supplement: online_data.pdf [file online_data.pdf]
